# Supplementary material
Source: PubMed Central journal article supplement (PMC5181113)
Supplement: cn6b00210_si_001.pdf [file cn6b00210_si_001.pdf]

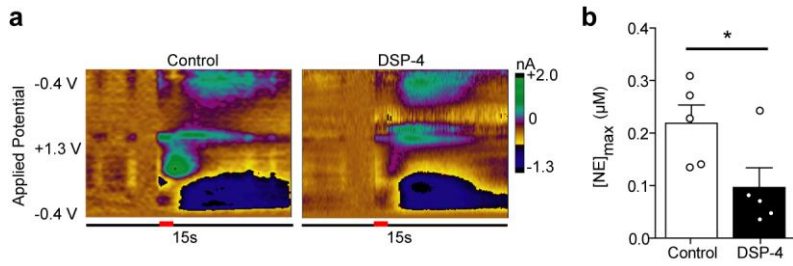

**Supplemental Figure S1:** DSP-4 treatment attenuates norepinephrine release in the anteroventral thalamus (AV). (a) Representative color plots demonstrating norepinephrine release in the AV after 1 s electrical stimulations (red bar) of the ipsilateral DNB in control and DSP-4 treated rats. (b) Maximal norepinephrine release ( $NE_{max}$ ) in the AV following ipsilateral DNB stimulations in control and DSP-4 treated rats. Average  $\pm$  SEM with individual experiments overlaid. \*,  $P < 0.05$ , unpaired T-test.
